# Supplementary material for: Impact of parameter updates on soil moisture assimilation in a 3D heterogeneous hillslope model
Source: Copernicus journal article supplement (doi:10.5194/hess-2022-311), 2022-09-26
Supplement: Supplementary file [file hess-2022-311-AC1-supplement.pdf]

Review of the manuscript Impact of parameter updates on soil moisture assimilation in a 3D heterogeneous hillslope model by Natascha Brandhorst and Insa Neuweiler

### Summary

The manuscript is well structured and written. Many studies have already been conducted on the topic, but I believe the present study provides some new insights. I have listed below only one general comment that would require additional analyses and some minor comments that should be considered to improve some descriptions and to strengthen the discussion. After that, the manuscript can be considered in my opinion for publication.

We thank the reviewer for the effort and time to revise our manuscript and for the positive rating. In the following, we want to respond in detail to the constructive comments he/she provided.

### General main comment

[1] The effect of the DA in the validation points are generally poor. There is no specific information on the correlation length ( $L$ ) of the generated random fields (L336) but I hypothesize that  $L$  is lower than the distance ( $d$ ) between the location of the assimilated observation and validation observation. Thus, it should be interesting to see at which distance ( $d$ ) DA improves the estimated soil moisture. There is no the need to run any other simulation but rather to calculate, e.g., RMSE at increasing  $d$ . It should be interesting to see and discuss if/when  $d > L$  the effect of DA is poor. On the one hand, this would help in defining where to install point-scale measurements. On the other hand, this would support the discussion of the low representativeness of point-scale measurements and the need for alternative soil moisture observations (e.g., L625).

This is a very interesting suggestion. The horizontal correlation length in the model is  $L=2m$  and thus, as the reviewer noticed correctly, much smaller than the distance  $d$  to the validation points. We will perform such an analysis and include it in the revised manuscript.

### Specific comments in order of appearance (Line number L)

L37. The problem of non-uniqueness due to insufficient observations is identified also in the present study. Moreover, however, the limited representativeness of point-scale soil moisture measurements is also highlighted. This could also be discussed in the conclusions of the present study.

This is a good suggestion. We will include a discussion on this issue in the conclusive part of the manuscript.

L85. Due to the limited improvements of the DA when more realistic heterogenous cases are performed, I wonder if the simplified approaches proposed in literature (by the application of Miller scaling (Bauser et al., 2020) or global calibration coefficients (Shi et al., 2014)), might be preferable. I'm not asking to conduct any additional simulations or DA tests but these approaches could be further recall in the discussion and conclusions, i.e., what do the Authors think about using these approaches in the lights of the results obtained in the present study?

This is a valid question. In our opinion, any additional constraints, that are imposed on the model, hinder the assimilation from reaching the optimal solution conditioned on the available observations. Simplified approaches are such constraints as they decrease the degrees of freedom of the data assimilation. Our approach to use a simplified layered soil structure is one example, although of course in a much stronger manner. There, we have seen that the filter performance is degraded and suppose a similar, yet less pronounced,

effect when using other simplifying approaches as e.g. Miller scaling or global calibration coefficients. We will add a paragraph regarding these simplified approaches in the discussion part of the manuscript.

L233. A few details about the high performance computer and the computational resources used for these tests might be useful to highlight the effort for performing the simulations in the present study.

We agree that this information is missing and will include it in the revised manuscript.

L240. Evaporation is prescribed and this might be one reason, in my opinion, of the instability of the simulations. If this is the case, I suggest the Authors extending the discussion based on that (e.g. at L385; at L431).

The reviewer is completely right here. The prescription of the evaporation flux, which does not consider the available water content in the upper soil, causes numerical instabilities. By assigning a less conductive soil layer with reduced spatial variability, a lid is kept on these instabilities. Alternatively, a moisture-dependent evaporation flux could have been implemented. Yet, this is only one reason for the numerical issues. These occur just as often during precipitation events as during evaporation events. Furthermore, there is no clear trend in the parameter combinations leading to numerical issues that allow for reliable conclusions. We will mention the prescribed evaporation as one reason for the numerical instabilities at the respective parts in the manuscript, but a more profound discussion would require additional testing.

L233. Please specify here the thickness of each soil layer.

We will do that.

L246. If possible, please justify why you have used 181 days.

We used a times series starting from the 1<sup>st</sup> of January and ending at the 30<sup>st</sup> of June. This sums up to 181 days. We will add this information.

L250-252. The Authors well acknowledge that the experiments have been conducted eliminating some unwanted sources of uncertainty. Thus, it should be argued that, in real test cases, the results could be even worse than the one presented here. I would recall this aspect in the discussion and conclusion.

Yes, this is to be expected and we will include this aspect in the discussion and conclusion part of the manuscript.

L291. How soil set-up is created (the random fields) is not well described. Information is reported only later (L335-338) but without information of the correlation length. I believe these are important details as different results can be obtained with different set-up. Thus, this information should also be presented at the beginning of the section.

We agree that this information should be given right at the beginning of this section. We will move lines 335-338 to the beginning and specify the used correlation length.

L339. I suggest adding here a title "3.4 Performance metrics". I would then move the title "4. Results and discussion" before L354.

This is a good idea and would increase the readability of the manuscript. We will change the title and add the performance matrices regarding the parameter estimates in l.437-441 and l.457-459 to this subsection, too.

L420-421. Correlations between parameters and states at the validation locations and the observations are too small to induce an update of the former. This in my opinion could be related to the correlation length of the random field (L). See general comment #1 above. If this is the case, the discussion should be extended accordingly.

As mentioned in our answer to general comment #1, we agree with the reviewer and will revise the manuscript accordingly.

Figure 9. Not sure if I missed something, but I did not get why reference values are not plotted here. If possible, I would also add these lines (as red lines in figure 6). Discussion should be extended accordingly at L419.

We can add the reference parameter distribution to the figure. This is not done in the original version because the message of the figure is the difference in ensemble spread and not the bias compared to the reference distribution. Yet, we understand that this could be an interesting information and will include it.

L336-341. I would move NMD description to the method section after the description of the RMSE (i.e., L353). All together this sub-section should be named e.g., "3.4 Performance metrics"

As stated in our answer to the comment on L339, we will do this. The same applies for the description of the NMV (L457-459).

L525. Point instead of colon?

Yes, we agree that a point would fit better here and will change this.

L588. The term cumulative value could be in my opinion misleading. Please specify, e.g., variance of the field, cumulative density functions etc.

We mean spatially cumulative values. In this case, the spatial mean is taken as example. We will make this clearer.

L614-615. Updating the saturated hydraulic conductivity turned out to be less important. This might be related to the upper boundary condition used (i.e., figure 2) while the results could be different when other hydrological conditions are prescribed. If this is the case, I would extend the discussion accordingly.

No, quite the contrary, in combination with this boundary condition, we found that the saturated hydraulic conductivity is quite important. In other setups (1d experiments in Brandhorst et al., 2018) we saw a clear influence of updating the saturated hydraulic conductivity while also prescribing the evaporation flux. So there must be another reason for its update being less influential here, but as we could only guess here, we prefer not to extend the discussion into this direction and cannot say more than that this must be case-specific.

L620. Cumulative quantities. Please be more precise (see also comment above L588).

We mean spatially cumulative values and refer to our answer to the comment on L588.

L625. Here I assume that you mean soil moisture observation from remote sensing and cosmic ray neutron probe. I would rephrase to be more precise.

We agree that this formulation is misleading and will rephrase the sentence.
